# Supplementary material
Source: PubMed Central journal article supplement (PMC2662312)
Supplement: M806745200_1.pdf [file M806745200_1.pdf]

## Supplementary Materials

### Supplementary figure 1: Enzymatic activity of wild-type *G/LeuRS* and *G/LeuRS* CP2 domain deletion mutant.

(A) The ATP-PPi exchange reaction was carried out using 1 mM Leu with 20 nM *G/LeuRS* (●) and *G/LeuRS*- $\Delta$ CP2 (○). (B) Post-transfer editing was performed using 2  $\mu$ M [ $^3$ H]-Ile-tRNA<sup>Leu</sup> from *G/tRNA*<sup>Leu</sup> with 20 nM *G/LeuRS* (●) and *G/LeuRS*- $\Delta$ CP2 (○). Control (spontaneous hydrolysis) (▼) was performed in the absence of enzyme.

### Supplementary figure 2: The conservation of the CP2 domain function in LeuRSs from prokaryotic and archaeal groups.

(A) The ATP-PPi exchange reaction of *EcLeuRS* (●) and its CP2 domain deletion mutant (○) was carried out using 1 mM Leu and 20 nM enzyme. (B) Post-transfer editing was performed using 2  $\mu$ M [ $^3$ H]-Ile-tRNA<sup>Leu</sup> from *Ec*tRNA<sup>Leu</sup>, and 20 nM *EcLeuRS* (■) and its CP2 domain deletion mutant (○). Controls (spontaneous hydrolysis) (▼) were performed in the absence of enzyme. (C) The ATP-PPi exchange reaction of *PhLeuRS* (●) and its CP2 domain deletion mutant (○) was carried out using 2 mM Leu, and 50 nM *PhLeuRS* and its CP2 domain deletion mutant at 65°C. (D) Post-transfer editing was performed using 2  $\mu$ M [ $^3$ H]-Ile-tRNA<sup>Leu</sup> from *Ph*tRNA<sup>Leu</sup>, and 100 nM *PhLeuRS* (○) and its CP2 domain deletion mutant (●) at 37°C. Controls (spontaneous hydrolysis) (▼) were performed in the absence of enzyme.

**Supplementary table 1. Kinetics of *G/LeuRS* and its mutants in ATP-PPi exchange reaction.**

| Enzyme | ATP                     |                               |                                                 | Leu                     |                               |                                                 |
|--------|-------------------------|-------------------------------|-------------------------------------------------|-------------------------|-------------------------------|-------------------------------------------------|
|        | $K_m$ ( $\mu\text{M}$ ) | $k_{cat}$ ( $\text{s}^{-1}$ ) | $k_{cat}/K_m$ ( $\text{s}^{-1}\text{mM}^{-1}$ ) | $K_m$ ( $\mu\text{M}$ ) | $k_{cat}$ ( $\text{s}^{-1}$ ) | $k_{cat}/K_m$ ( $\text{s}^{-1}\text{mM}^{-1}$ ) |
| WT     | $750.4 \pm 61.2$        | $34.5 \pm 2.3$                | 46.0                                            | $14.2 \pm 1.5$          | $30.5 \pm 3.5$                | 2147.8                                          |
| K587A  | $779.8 \pm 80.6$        | $15.6 \pm 2.6$                | 20.0                                            | $14.6 \pm 3.2$          | $13.1 \pm 2.1$                | 897.3                                           |
| D588A  | $701.8 \pm 77.3$        | $18.0 \pm 2.9$                | 25.6                                            | $17.8 \pm 2.9$          | $14.0 \pm 2.4$                | 786.5                                           |
| D603A  | $775.3 \pm 83.5$        | $32.3 \pm 3.2$                | 41.7                                            | $13.8 \pm 1.9$          | $27.9 \pm 3.4$                | 2021.7                                          |
| K606R  | $735.7 \pm 68.9$        | $33.1 \pm 3.9$                | 45.0                                            | $13.6 \pm 2.5$          | $29.0 \pm 3.1$                | 2132.4                                          |
| K606E  | $789.2 \pm 76.2$        | $32.7 \pm 3.2$                | 41.3                                            | $15.0 \pm 3.4$          | $32.0 \pm 4.1$                | 2133.3                                          |
| K606L  | $803.4 \pm 96.2$        | $31.5 \pm 2.5$                | 39.2                                            | $14.9 \pm 2.6$          | $31.3 \pm 3.6$                | 2100.7                                          |
| K606D  | $813.3 \pm 92.1$        | $32.1 \pm 3.6$                | 39.5                                            | $16.0 \pm 3.3$          | $28.5 \pm 3.5$                | 1781.3                                          |

All values were the average of 3 experiments.

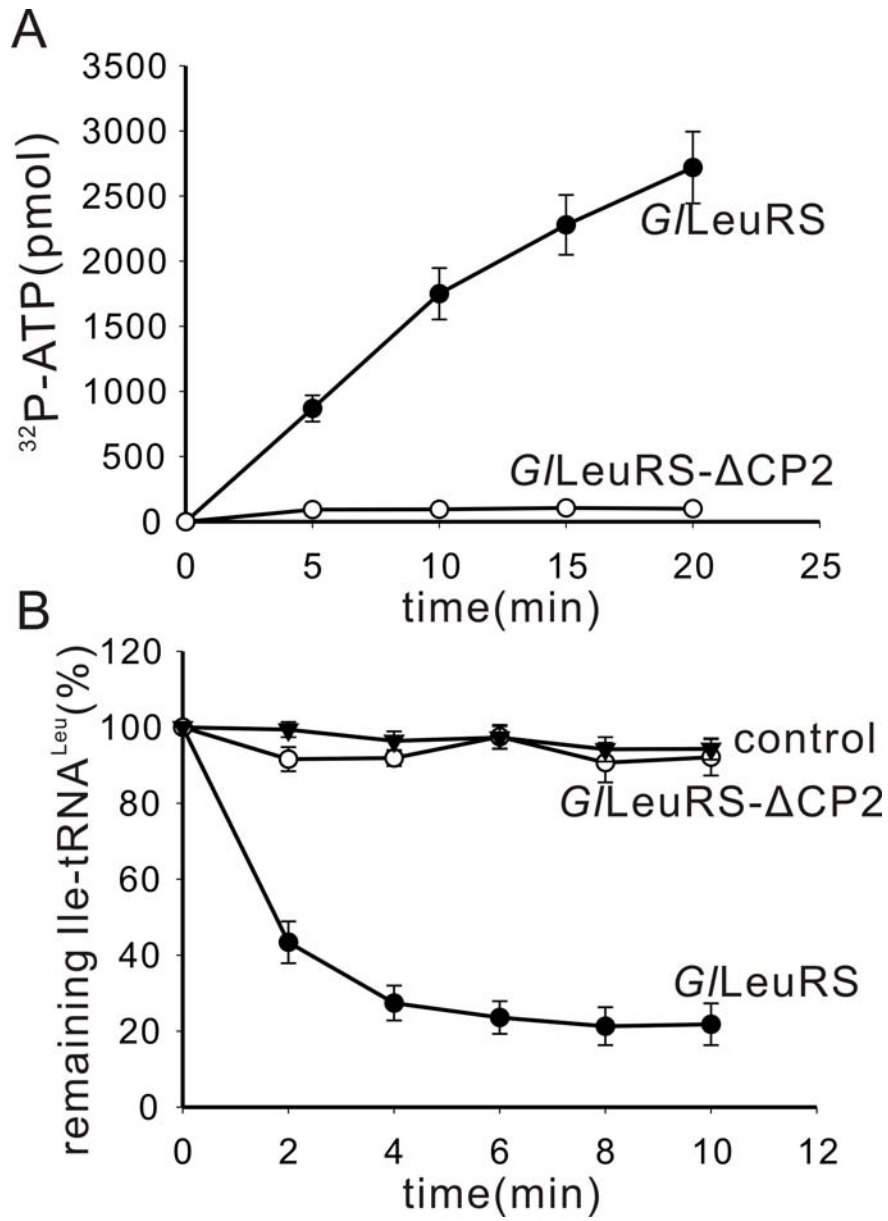

Supplementary figure 1

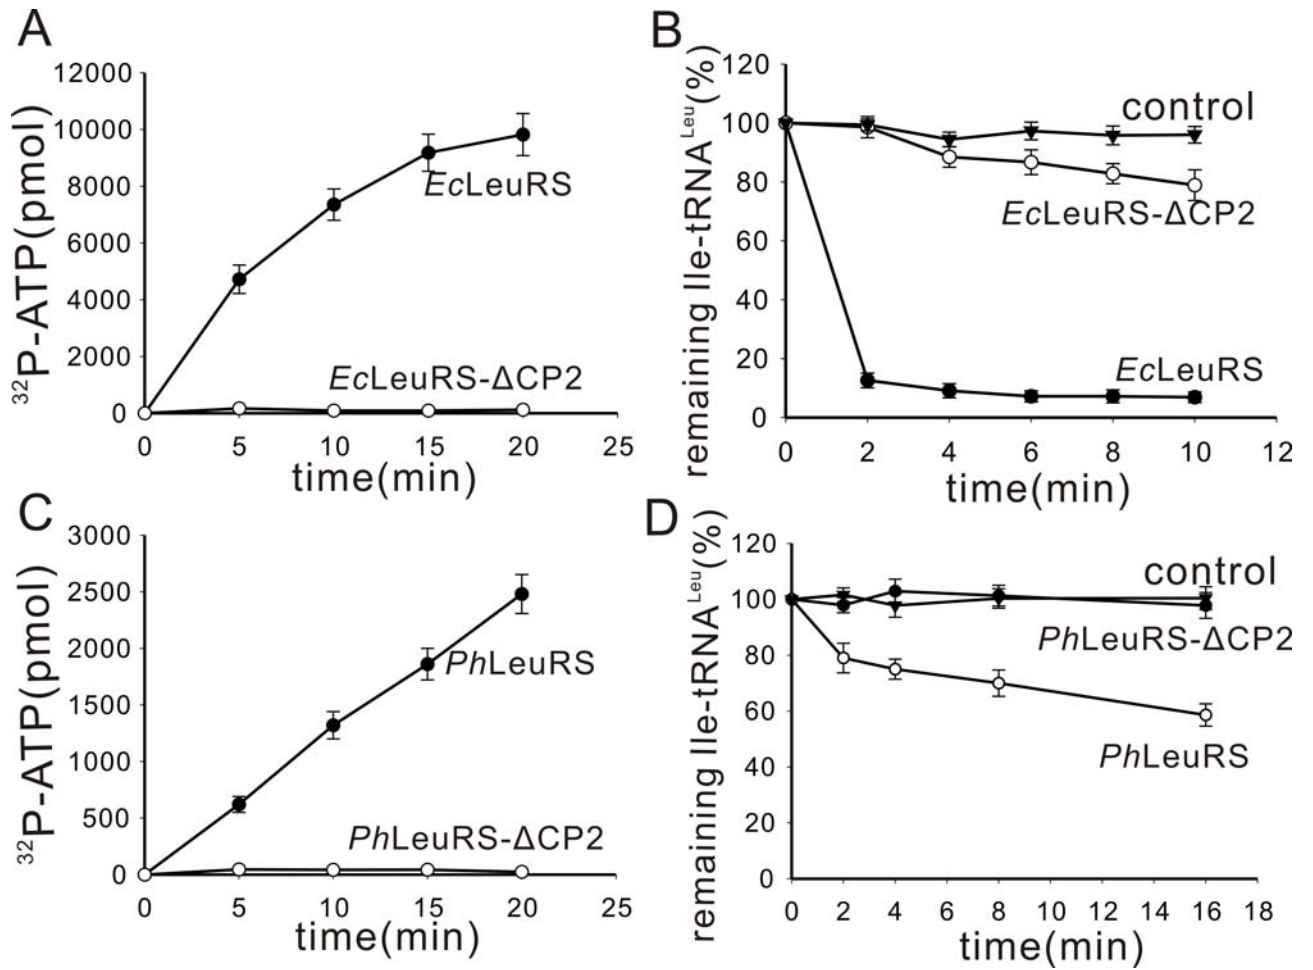

Supplementary figure 2
